# Supplementary material for: Pulmonary Neuroendocrine Cells Sense Succinate to Stimulate Myoepithelial Cell Contraction
Source: PubMed Central journal article supplement (PMC9762774; doi:10.1016/j.devcel.2022.08.010), 2022-09-14
Supplement: NIHMS1833894-supplement-Supplementary_Material.pdf [file NIHMS1833894-supplement-Supplementary_Material.pdf]

## Yu, Fig. S1

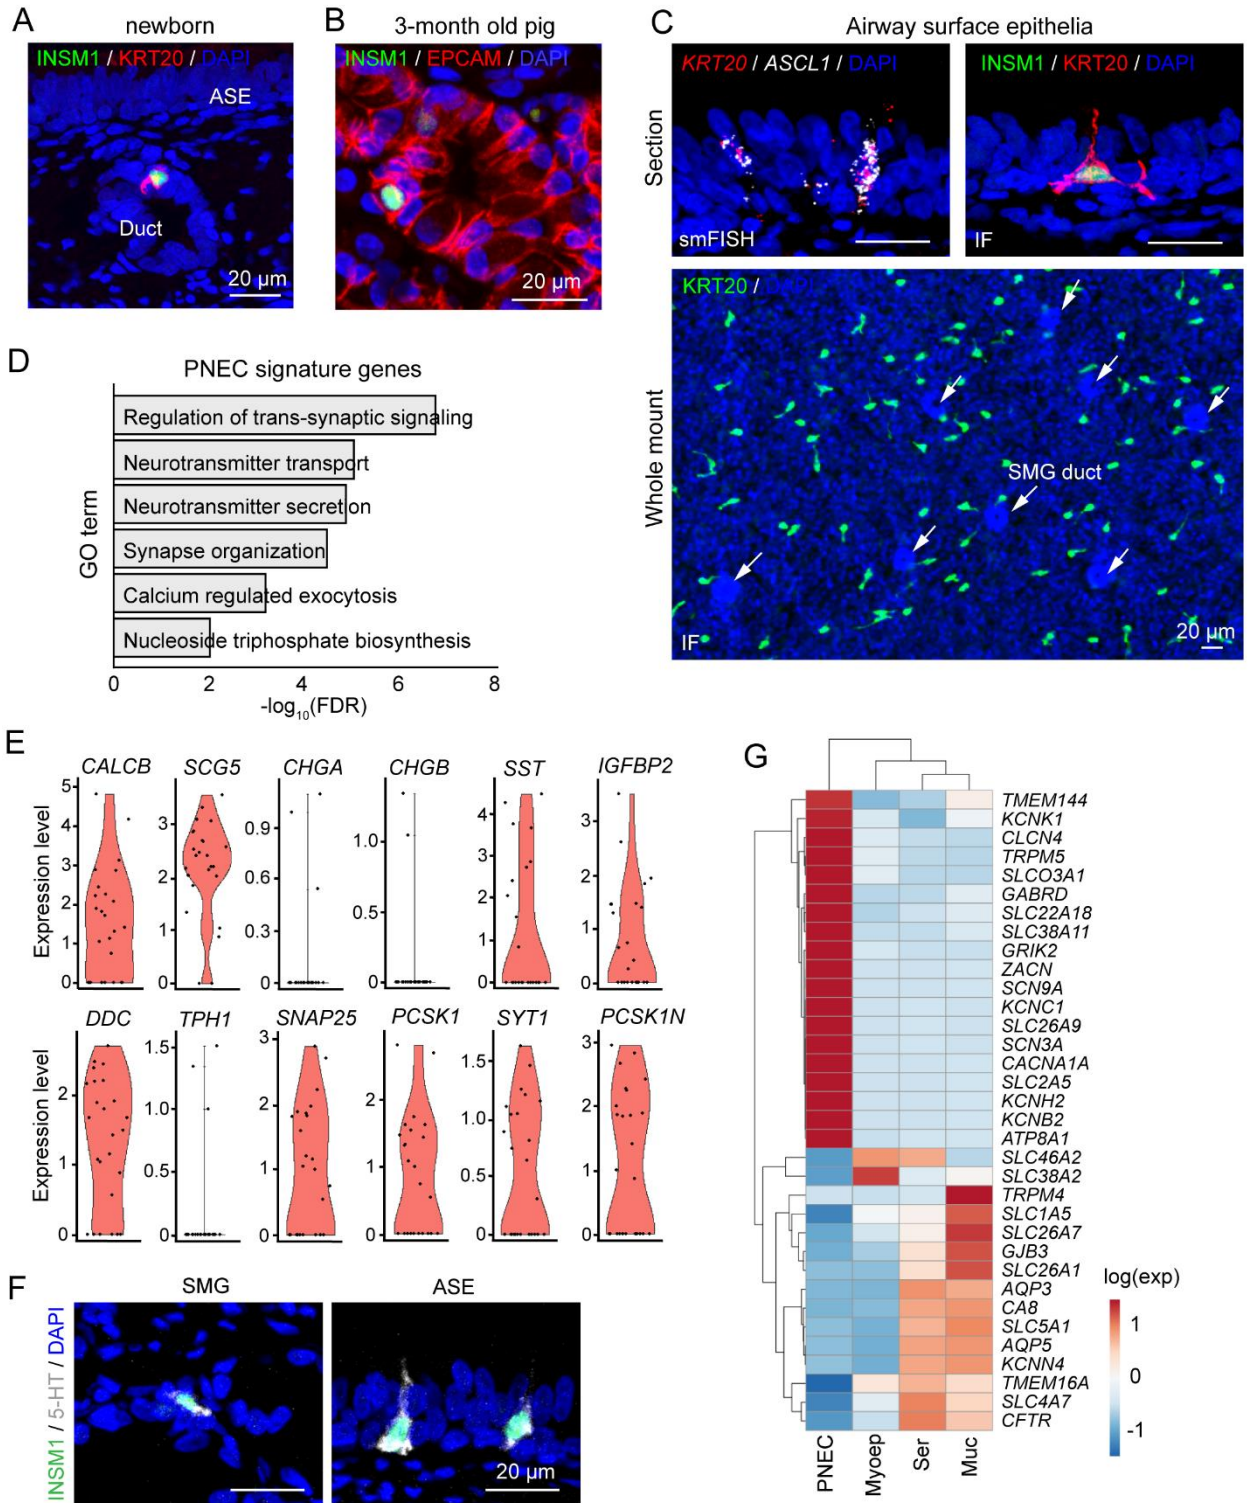

**Figure S1 | Characterization of PNECs in SMGs and airway surface epithelia, Related to Figure 1.**

- A)** Representative image of PNECs (INSM1+ green, KRT20+ red, DAPI blue) in SMG ducts.
- B)** Representative images of PNECs (INSM1+, green) in acinar SMGs (EPCAM+, red) of 3-month-old pigs.
- C)** Representative images of smFISH and immunofluorescence (IF) staining of PNEC markers in airway surface epithelia of newborn pig sections and whole mount tissues.
- D)** Gene ontology (GO) analysis of PNEC signature genes. FDR, false discovery rate.
- E)** Expression of genes that are involved in secretory function in porcine SMG PNECs. Upper panel, genes for neurotransmitters and neuropeptides; lower panel, genes involving in neurotransmitter processing.
- F)** Serotonin (5-HT, gray) in SMG and airway surface PNECs (INSM1+). ASE, airway surface epithelia.
- G)** Heatmap of PNEC signature transporters and representative transepithelial electrolyte transporters in SMGs. Ser, serous cell; Myoep, myoepithelial cell; Muc, mucous cell.

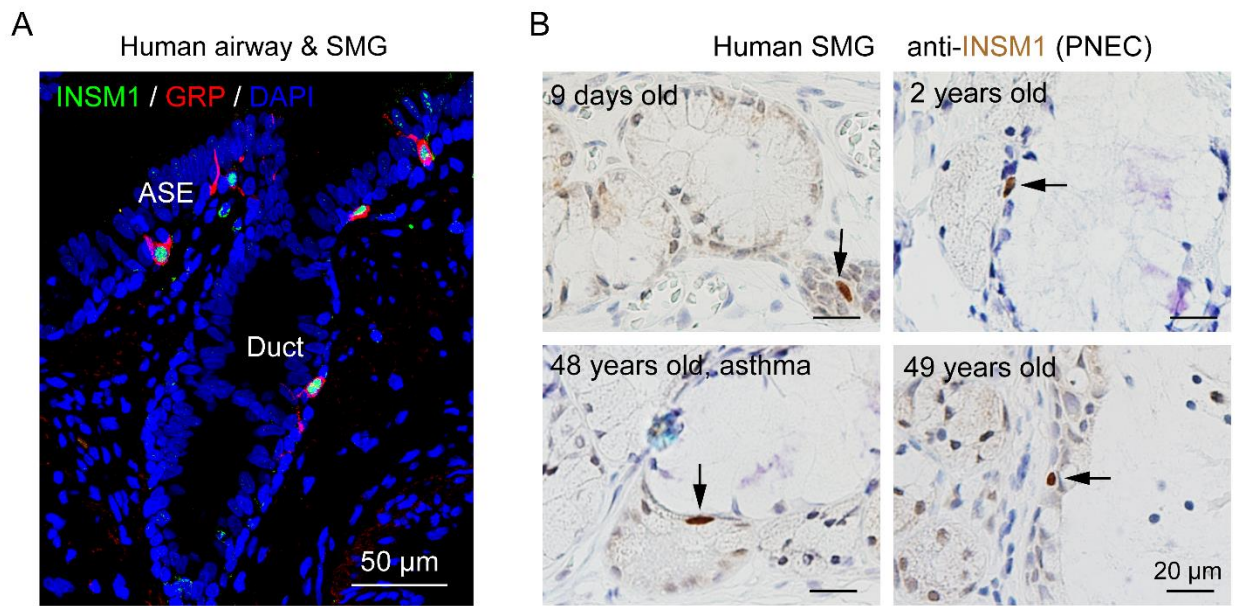

**Figure S2 | Characterization of PNECs in human SMGs, Related to Figure 1.**

**A).** Immunofluorescence of PNEC markers (INSM1 & GRP) in human airways and SMGs. ASE, airway surface epithelia.

**B).** PNECs (INSM1+, arrows) in human airway SMGs. The age and disease of the human donor lungs are shown.

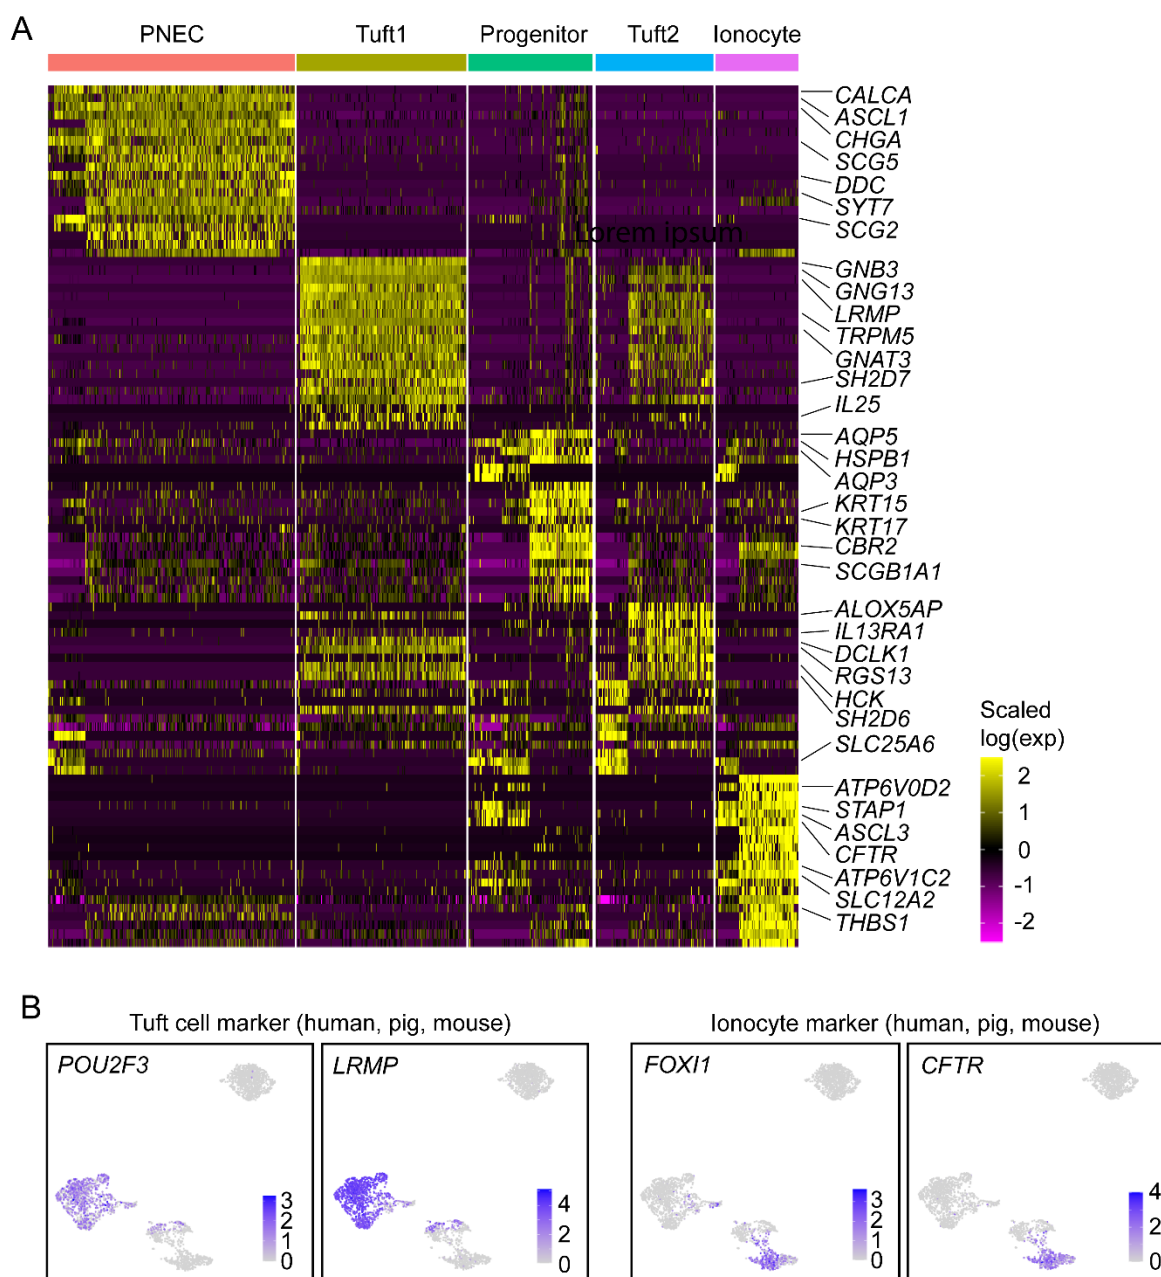

**Figure S3 | Gene expression pattern in rare cell types, Related to Figure 2.**

**A)** Heatmap of top 20 markers for rare cell types in human, pig, and mouse airway scRNA-seq datasets. Cell type names were assigned based on known markers for that cell type.

**B)** Expression of tuft cell and ionocyte markers in uniform manifold approximation and projection (UMAP).

## Yu, Fig. S4

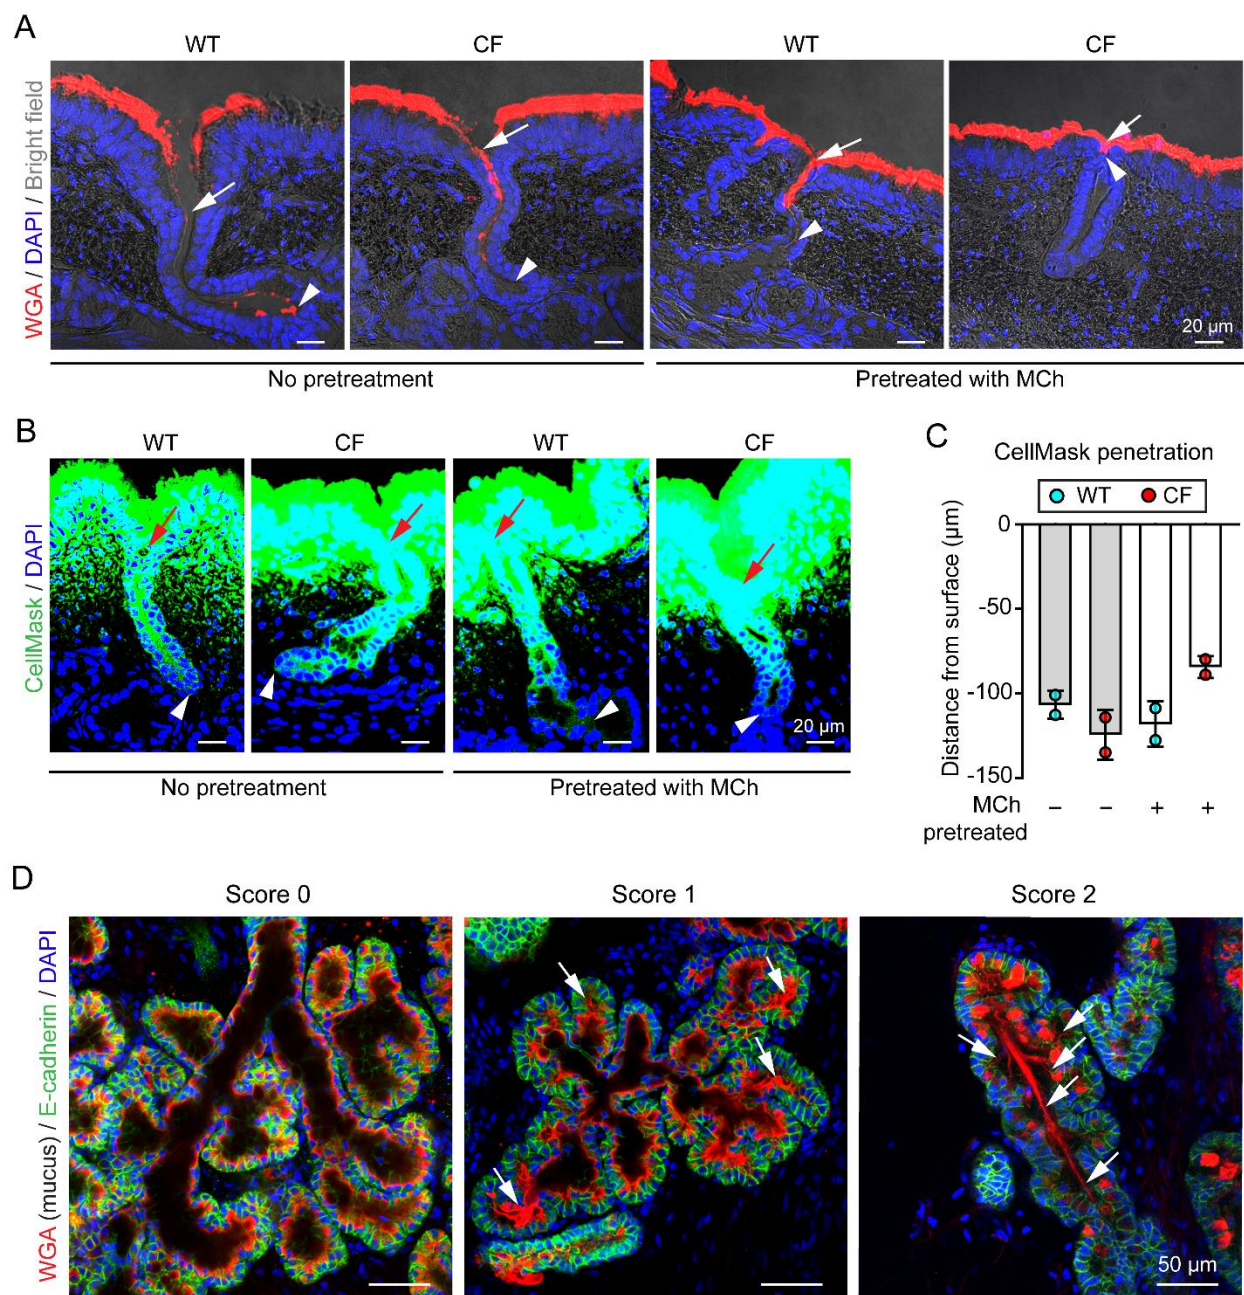

**Figure S4 | Mucus obstruction reduces molecule diffusion in CF SMGs, Related to Figure 3.**

**A, B)** Examples of rhodamine-WGA (**A**) and CellMask (**B**) diffusion into SMGs of WT and CF pigs. Tracheal segments were treated with methacholine (10  $\mu$ M) for 10 minutes, washed with Hank's balanced salt solution 3\*10 minutes before starting the diffusion assay. Arrows point to the SMG ducts at the airway surface; arrowheads point to the WGA or CellMask signals deep in SMG ducts.

**C)** Summary of distance that CellMask (50  $\mu$ M) penetrating down SMG lumen.

**D)** Representative images of MUC5B mucin staining (WGA, red) in SMGs (E-cadherin+).

Mucus scores were assigned to individual SMGs based on the abundance of mucus in the lumen of SMGs. Score 0, no mucus; score 1, small amount of attached mucus (arrows); score 2, mucus strands across most of the lumen. The images from 'Score 2' in Figure S4D and 'CF' in Figure 3D are different image layers from the same SMG.

## Yu, Fig. S5

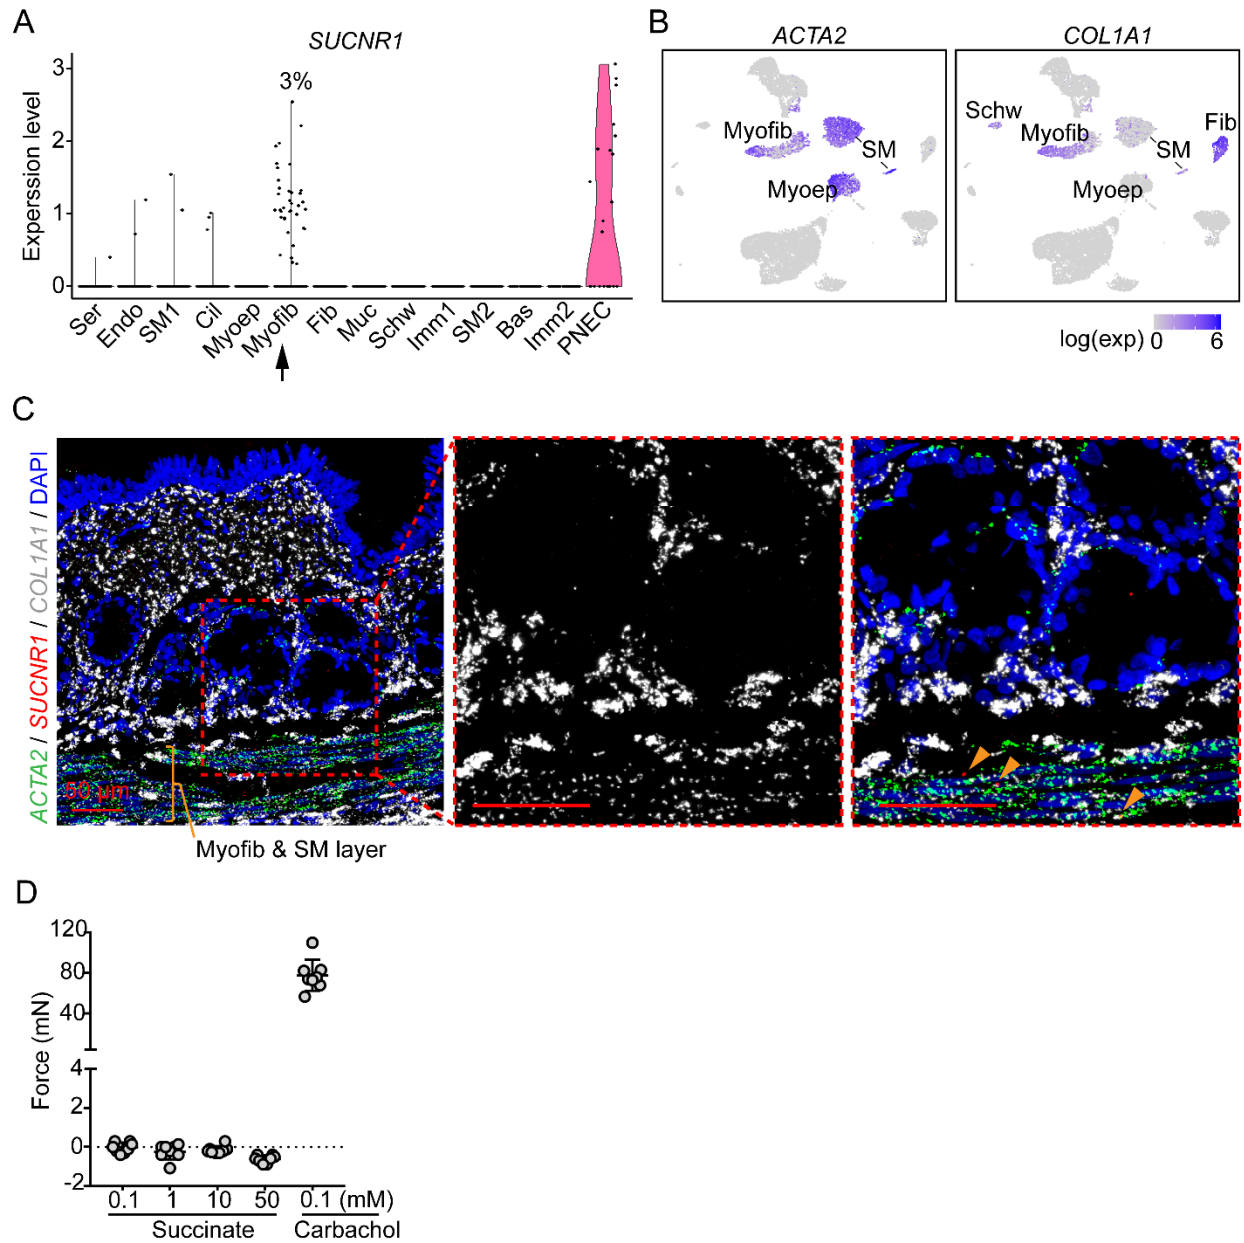

**Figure S5 | Succinate does not induce myofibroblast contraction, Related to Figure 4.**

- A)** Plot of *SUCNRI* expression in SMG scRNA-seq data grouped by cell type (Yu et al., 2022). Arrow points a small proportion (~3%) of myofibroblasts expressing *SUCNRI*. Ser, serous cell; Endo, endothelial cell; SM, smooth muscle cell; Cil, ciliated cell; Myoep, myoepithelial cell; Myofib, myofibroblast; Fib, fibroblasts; Muc, mucous cell; Schw, Schwann cell; Bas; basal cell; Imm, immune cell.
- B)** Expression pattern of *ACTA2*, and *COL1A1* (Type 1 collagen,  $\alpha 1$ ) in SMG scRNA-seq data grouped by cell type.
- C)** Representative images of smFISH of *ACTA2*, *SUCNRI* and *COL1A1* in SMGs and surrounding tissues. Note that no *ACTA2+COL1A1+* cells (myofibroblasts) surround SMGs. A few cells (arrowheads) from the smooth muscle (SM) and myofibroblast (myofib) layer are stained for *SUCNRI*.
- D)** Smooth muscle and myofibroblast related tracheal contraction. 8 tracheal rings from 2 pigs were sequentially treated with different concentrations of succinate and carbachol. Values at the peak of each condition were recorded and included for analysis.



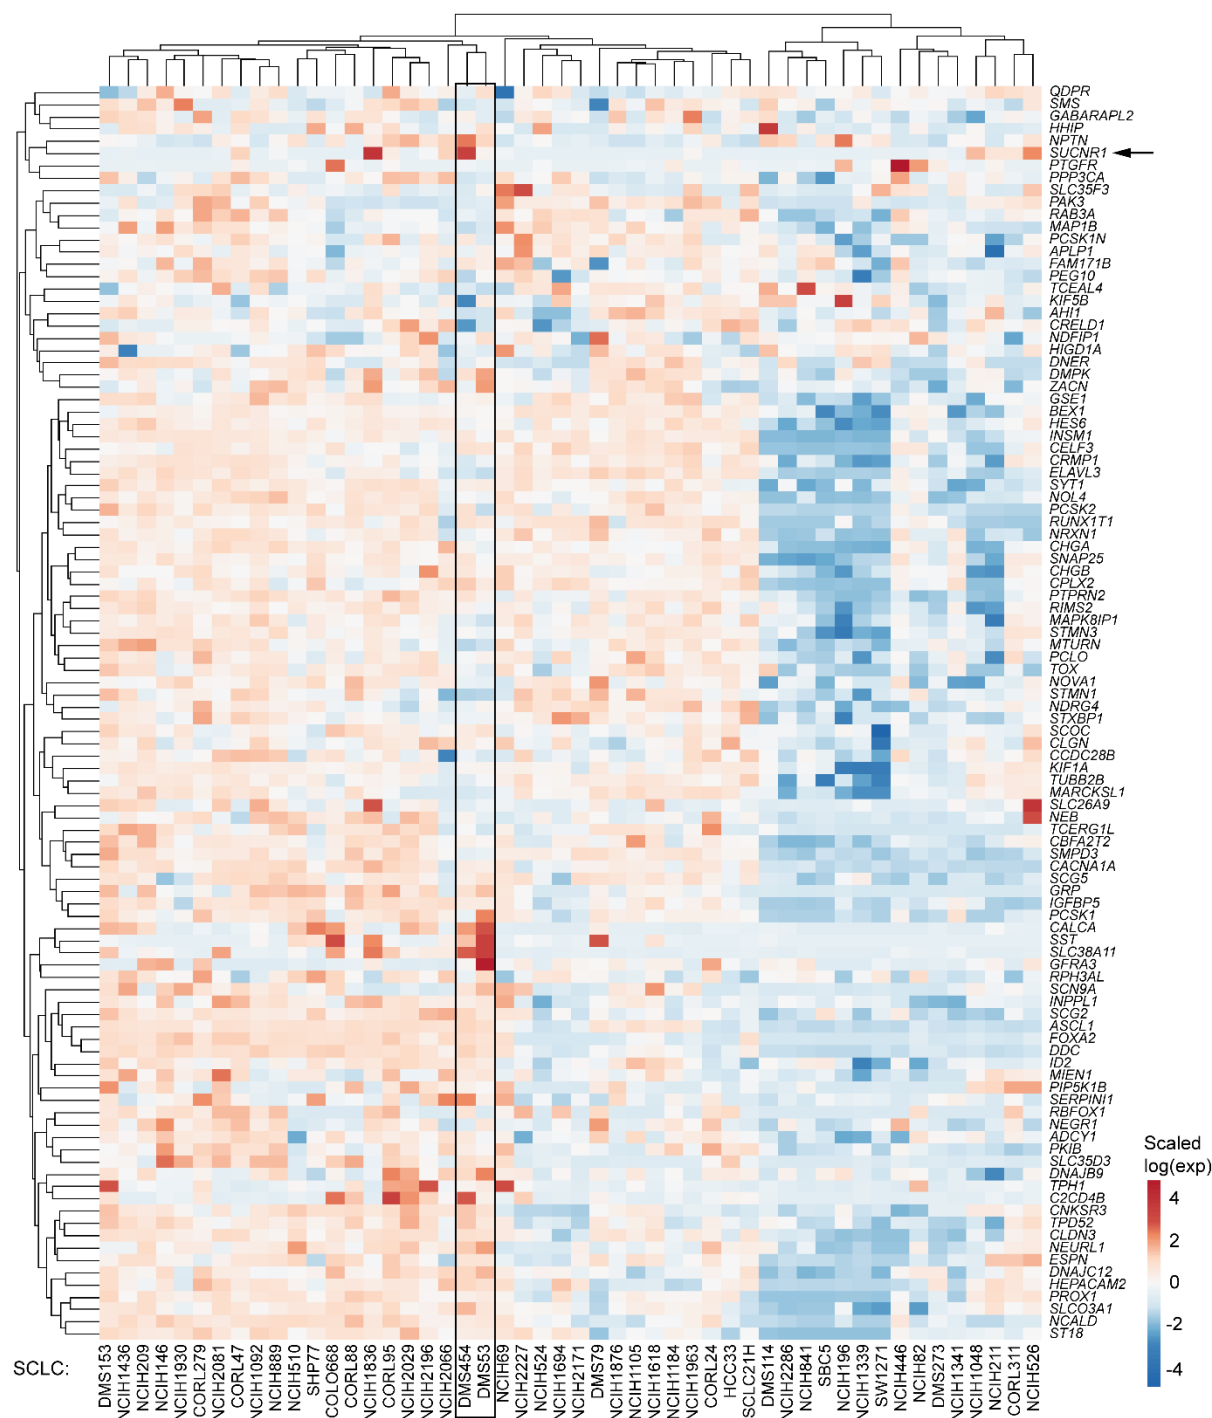

**Figure S6 | Characterization of PNEC-like small cell lung cancer cell lines, Related to Figure 5.**

Heatmap of PNEC marker gene expression in published RNA sequencing of small cell lung cancer (SCLC) cell lines (Ghandi et al., 2019). The columns for DMS454 and DMS53 cells are highlighted; arrow on right points to *SUCNR1*.

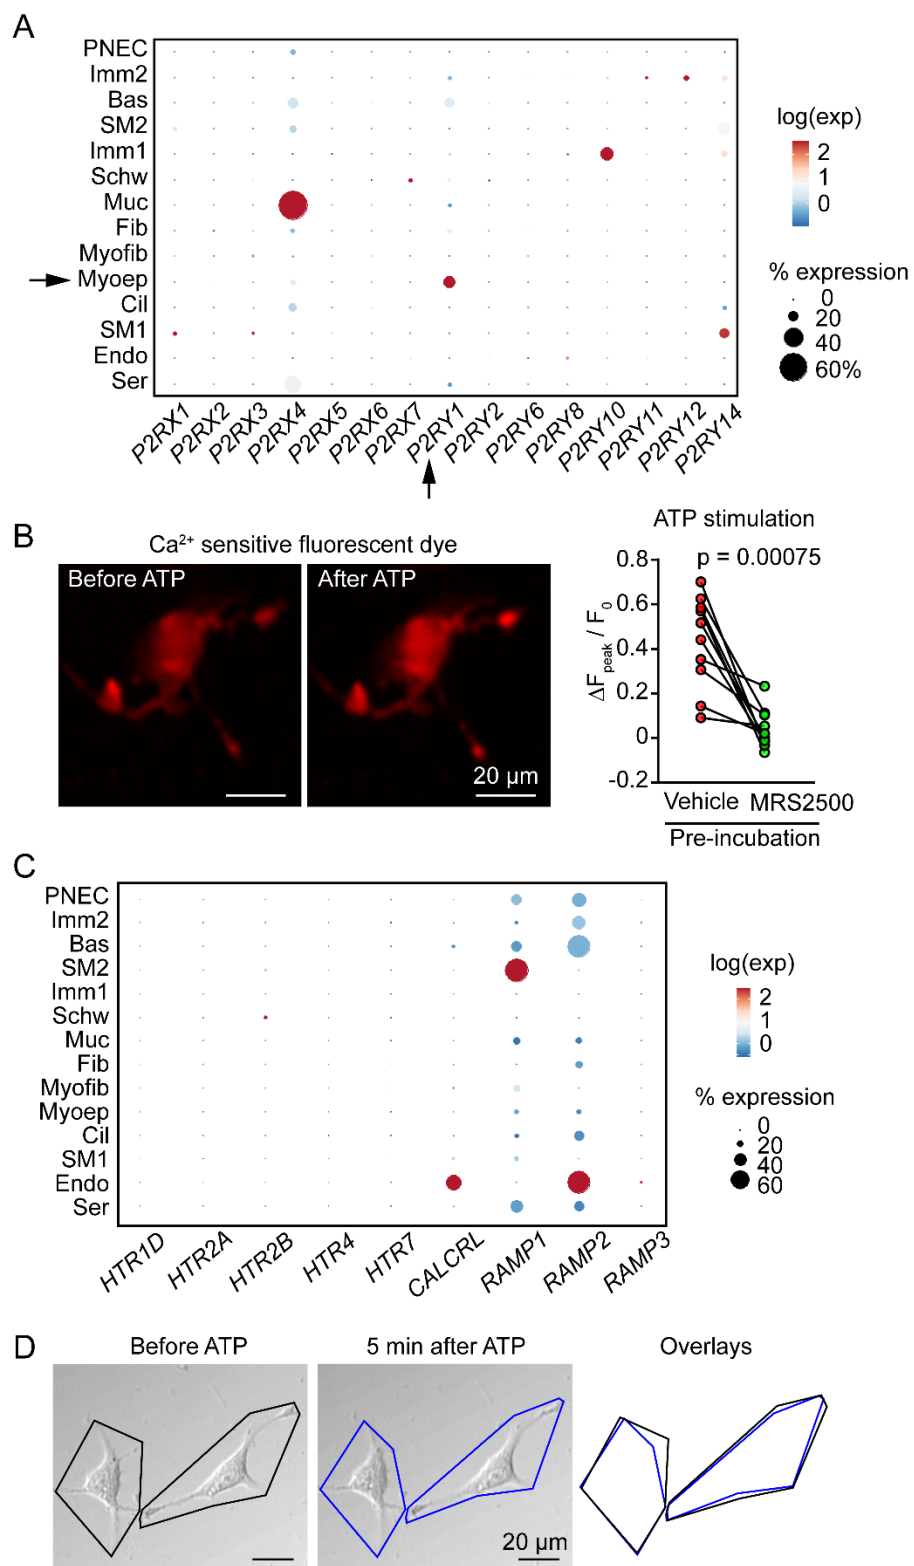

**Figure S7 | Myoepithelial cells respond to ATP via P2Y1 receptors, Related to Figure 7.**

**A)** Expression pattern of purinergic genes in SMG scRNA-seq data (Yu et al., 2022) grouped by cell type. P2X4 receptor (*P2RX4*), an apical expressed purinoceptor for ATP, is not accessible for basolateral ATP from PNECs. Myoepithelial distribution of P2Y1 receptor (*P2RY1*) makes it an interesting candidate for basolateral ATP from SMG PNECs.

**B)** Representative images and summary of  $\text{Ca}^{2+}$  imaging in primary myoepithelial cells responding to ATP. Cells were labeled with a  $\text{Ca}^{2+}$  sensitive dye (BioTracker 609 Red  $\text{Ca}^{2+}$  AM Dye, Millipore sigma #SCT021). They were treated with or without P2Y1 receptor antagonist MRS2500 (2  $\mu\text{M}$ ) before  $\text{Ca}^{2+}$  imaging. Each data point represents the mean of imaged cells from a pig;  $p = 0.00075$ , paired Student's  $t$  test.

**C)** Expression pattern of 5-HT and CGRP receptors in SMG scRNA-seq data (Yu et al., 2022) grouped by cell type.

**D)** Bright field images of primary myoepithelial cells before and 5 minutes after ATP addition. Closed lines connect branch tips of individual myoepithelial cells (defined as total area). Overlays highlight reduction of total area after ATP treatment.

**Table S1. PNEC-specific G protein-coupled receptors, Related to Figure 2A.**

| <b>Gene</b>   | <b>p val</b> | <b>avg logFC</b> | <b>pct.1</b> | <b>pct.2</b> | <b>FDR</b> | <b>Mean expression</b> |
|---------------|--------------|------------------|--------------|--------------|------------|------------------------|
| <i>SUCNR1</i> | 0            | 1.529            | 0.48         | 0.003        | 0          | 1.537                  |
| <i>GABBR2</i> | 0            | 0.399            | 0.2          | 0            | 0          | 0.399                  |
| <i>PTGFR</i>  | 3.89E-115    | 1.670            | 0.72         | 0.023        | 7.62E-111  | 1.711                  |
| <i>GPR27</i>  | 1.32E-10     | 0.329            | 0.28         | 0.037        | 2.59E-06   | 0.387                  |
| <i>GPR143</i> | 1.38E-08     | 0.652            | 0.56         | 0.192        | 0.000270   | 0.824                  |
| <i>CELSR2</i> | 0.001359     | 0.261            | 0.2          | 0.058        | 1          | 0.321                  |
| <i>CELSR1</i> | 0.002409     | 0.408            | 0.32         | 0.134        | 1          | 0.534                  |
| <i>GPRC5C</i> | 0.006642     | 0.467            | 0.32         | 0.151        | 1          | 0.662                  |
| <i>ADGRL1</i> | 0.031497     | 0.324            | 0.32         | 0.184        | 1          | 0.543                  |
| <i>TPRA1</i>  | 0.100434     | 0.375            | 0.28         | 0.173        | 1          | 0.593                  |

Abbreviation: p val, p value; avg logFC, mean fold change at natural log scale; pct.1, percentage of positive gene expression in PNECs; pct.2, percentage of positive gene expression in non-PNECs; FDR, false discovery rate.

**Table S2. Myoepithelial cell specific receptors, Related to Figure 6A.**

| <b>Gene</b>   | <b>p val</b> | <b>avg logFC</b> | <b>pct.1</b> | <b>pct.2</b> | <b>FDR</b> | <b>Mean expression</b> |
|---------------|--------------|------------------|--------------|--------------|------------|------------------------|
| <i>NTRK3</i>  | 0            | 1.357            | 0.664        | 0.028        | 0          | 1.44                   |
| <i>FGFR1</i>  | 0            | 1.044            | 0.598        | 0.116        | 0          | 1.27                   |
| <i>CXCR4</i>  | 0            | 0.979            | 0.616        | 0.136        | 0          | 1.49                   |
| <i>LGR6</i>   | 0            | 0.469            | 0.213        | 0.012        | 0          | 0.48                   |
| <i>EDAR</i>   | 1.33E-210    | 0.266            | 0.121        | 0.006        | 2.60E-206  | 0.27                   |
| <i>P2RY1</i>  | 9.45E-195    | 0.534            | 0.247        | 0.041        | 1.85E-190  | 0.57                   |
| <i>FZD1</i>   | 2.60E-149    | 0.637            | 0.387        | 0.133        | 5.10E-145  | 0.8                    |
| <i>IL1RAP</i> | 2.93E-117    | 0.546            | 0.333        | 0.114        | 5.74E-113  | 0.72                   |
| <i>FZD7</i>   | 2.98E-80     | 0.419            | 0.244        | 0.084        | 5.83E-76   | 0.53                   |
| <i>F2RL1</i>  | 2.99E-59     | 0.457            | 0.328        | 0.168        | 5.86E-55   | 0.68                   |
| <i>TRAF5</i>  | 3.04E-57     | 0.286            | 0.156        | 0.047        | 5.95E-53   | 0.37                   |
| <i>RARG</i>   | 1.43E-41     | 0.366            | 0.228        | 0.11         | 2.80E-37   | 0.49                   |

Abbreviation: p val, p value; avg logFC, mean fold change at natural log scale; pct.1, percentage of positive gene expression in PNECs; pct.2, percentage of positive gene expression in non-PNECs; FDR, false discovery rate.

**Table S3. Antibodies, single-molecule fluorescence in situ hybridization probes, and qRT-PCR primers, Related to STAR Methods.**

| <b>Primary antibody information</b>     |              |                      |                 |                       |                            |                  |
|-----------------------------------------|--------------|----------------------|-----------------|-----------------------|----------------------------|------------------|
| <b>Name</b>                             | <b>cat #</b> | <b>Ventor</b>        | <b>Dilution</b> | <b>Tested species</b> | <b>Section type</b>        | <b>IHC or IF</b> |
| Anti-INSM1                              | sc-271408    | SANTA CRUZ           | 1:200           | Human, pig            | Cryosection & FFPE         | IF & IHC         |
| Anti-KRT20                              | M02828       | BOSTER               | 1:500           | Pig                   | Cryosection & FFPE         | IF & IHC         |
| Anti-5-HT                               | sc-58031     | SANTA CRUZ           | 1:100           | Pig                   | Cryosection                | IF               |
| Anti-EPCAM                              | 50-108-70    | Thermo Fisher        | 1:100           | Pig                   | Live tissue                | IF               |
| Anti-EPCAM                              | LS C700352   | LSBio                | 1:100           | Pig                   | Cryosection & whole tissue | IF               |
| Anti-SYP                                | sc-17750     | SANTA CRUZ           | 1:200           | Pig                   | Cryosection                | IF               |
| Anti-SUCNR1                             | NBP1-00861   | Novus biologicals    | 1:200           | Human, pig            | Cryosection & FFPE         | IF               |
| Anti-SUCNR1                             | LS-A3315-50  | LSBio                | 1:200           | Human, pig            | Cryosection & FFPE         | IF               |
| Anti-SUCNR1                             | AP01338PU-N  | OriGene Technologies | 1:200           | Human, pig            | Cryosection & FFPE         | IF               |
| Anti-SUCNR1                             | ASR-090      | Alomone Labs         | 1:200           | Human, pig            | Cryosection & FFPE         | IF               |
| Anti-CGRP                               | sc-57053     | SANTA CRUZ           | 1:100           | Human                 | FFPE                       | IF               |
| Anti-P2Y1R                              | sc-377324    | SANTA CRUZ           | 1:100           | Pig                   | FFPE                       | IF               |
| Anti- $\alpha$ SMA                      | A2547        | Sigma-Aldrich        | 1:100           | Pig                   | Cryosection                | IF               |
| Anti-KRT5                               | 905501       | BioLegend            | 1:500           | Pig                   | Cryosection                | IF               |
| Anti-Myc tag                            | MA1-21316    | Thermo Fisher        | 1:500           | Human                 | Cryosection                | IF               |
| Anti-E-cadherin                         | 3195         | Cell Signaling       | 1:200           | Pig                   | Whole tissue               | IF               |
| Anti-MUC5AC                             | ab3649       | Abcam                | 1:1000          | Human                 | FFPE                       | IF               |
| Anti-MUC5B                              | HPA008246    | Sigma-Aldrich        | 1:200           | Human                 | FFPE                       | IF               |
| <b>Secondary antibody information</b>   |              |                      |                 |                       |                            |                  |
| Thermo Fisher                           |              | Alexa Fluor 488      | Alexa Fluor 568 | Alexa Fluor 647       |                            |                  |
| Goat anti-rabbit IgG antibody conjugate |              | 1:500 ~ 1:1000       | 1:500 ~ 1:1000  | 1:500 ~ 1:1000        |                            |                  |
| Goat anti-mouse IgG antibody conjugate  |              | 1:500 ~ 1:1000       | 1:500 ~ 1:1000  | 1:500 ~ 1:1000        |                            |                  |
| Goat anti-rat IgG antibody conjugate    |              |                      |                 | 1:500 ~ 1:1000        |                            |                  |

---

**Single-molecule fluorescence in situ hybridization probes**


---

| <b>Pig Gene</b> | <b>mRNA sequences targeted by paired probes</b>                                                                                                                               |
|-----------------|-------------------------------------------------------------------------------------------------------------------------------------------------------------------------------|
| <i>ASCL1</i>    | GTCGGACGAGGGCTCTTACGACCCGCTCAGCCCA<br>AACCAACCTCTATGCCAACTAAGCGTCACATGCGAAGC<br>CTCCAACCATTACGGAGATAGAAAGAGTGACTAGGGCCT<br>TGTGCTATACTCAGTCCTTTAAAGCCCCAATTGGTGG              |
| <i>KRT20</i>    | TTCTAGACGCGTGGTGAGCTATGGGAGCGACCAAGCTGAA<br>GAGGAGGAAGTGCAGAGTCTACGCGCTCATCTGGGCAATA<br>GGAGGAAACCAAAGCTCGTTATGGTGCCTATCTGGCCAAA<br>TGGTGCAGATTCCGACCGATAACAGAACACCAGATCAATGA |
| <i>SUCNR1</i>   | TATGGACACATGCTCTGCATAAGCAACCGATACGTGCTTC<br>TTTTATCAGCATTGATCGATACATTCTCATGAAGTATCCT<br>ATTTGGGGTTTAGTAAGTGTAGAGCTCCTGCCATACTTC<br>CTGTGAATAGCACCAGCTGTACTGATTATGCGAGTTCTGG   |
| <i>POU2F3</i>   | GCACCATGCCTGGAACAGTAACGTCATCCTGTTCCCCTG<br>CTGTGATTGAACCGTGTGCTAACTCCTAGTGCTCTTGAAA<br>CTGCGGCCGTGGTCTTTTTAGGAAGGACCTCTTGCCATT<br>ACAATCTCCAAACAGATTCTAGACTCTGGAAAGATTTGCA    |
| <i>SLC17A9</i>  | CTCTGGGTGTGGTACGTGTACAAGTGCCTGCTGAGCGA<br>CCACCTCATCAATCAGGGTTATAGGACCATCTCCGTGCGG                                                                                            |
| <i>ACTA2</i>    | CGTCCATTGTGGGACGTCCTAGACATCAGGGGGTGATGGT<br>CACCACTCTTTCTACAATGAGCTTCGTGTTGCCCCAGAAG<br>GATCATTGCCCTCCTGAGCGCAAATACTCCGTCTGGA                                                 |
| <i>PCP4</i>     | ATCCCGGAGCTGCCGTTACAACATCATGAGTGAGCGA<br>CCATCATCTGTCAAAAATTAAGCAACACCCTTGA<br>GCATGTACAGAGACCGTGCTATTTATACCCTGGTAGGAAG                                                       |
| <i>P2RY1</i>    | GGCCCCAGAGCCGAAGTACTGGCATGCAAGGTAGG<br>CCAGTCCAGTTCGGTCATAGATCGGGACGGATTCATGG<br>TCCCGTTCAAATGCGCGCTTACCAAGACAGGCTTCCAATT<br>GCATCAGTGCGCACCGGTACAGCGGTGTGGTGTACCCT           |
| <i>COL1A1</i>   | CACGCATGAGCGGACGCTAACCCCCACCCAGCCG<br>CGTACAGAACGGCCTCAGGTACCATGACCGAGACGTGTGG<br>CTTGCTCCCCAGTTGTCTTATGGCTATGATGAGAAGTCA                                                     |

---

---

**qRT-PCR primers**

---

| <b>Human Gene</b> | <b>Forward</b>       | <b>Reverse</b>          |
|-------------------|----------------------|-------------------------|
| <i>RPL13A</i>     | GGCCCCTACCACTTCCG    | ACTGCCTGGTACTTCCA       |
| <i>SUCNR1</i>     | GGAGACGTGCTCTGCATAAG | AGGTGTTCTCGGAAAGGATACTT |
| <i>SLC17A9</i>    | CACCTCGGGGATCGGATTG  | GCAGGGAAGTAAACCCCTTGG   |

---
